# Supplementary material
Source: PubMed Central journal article supplement (PMC2852355)

Rando – Fig.S1

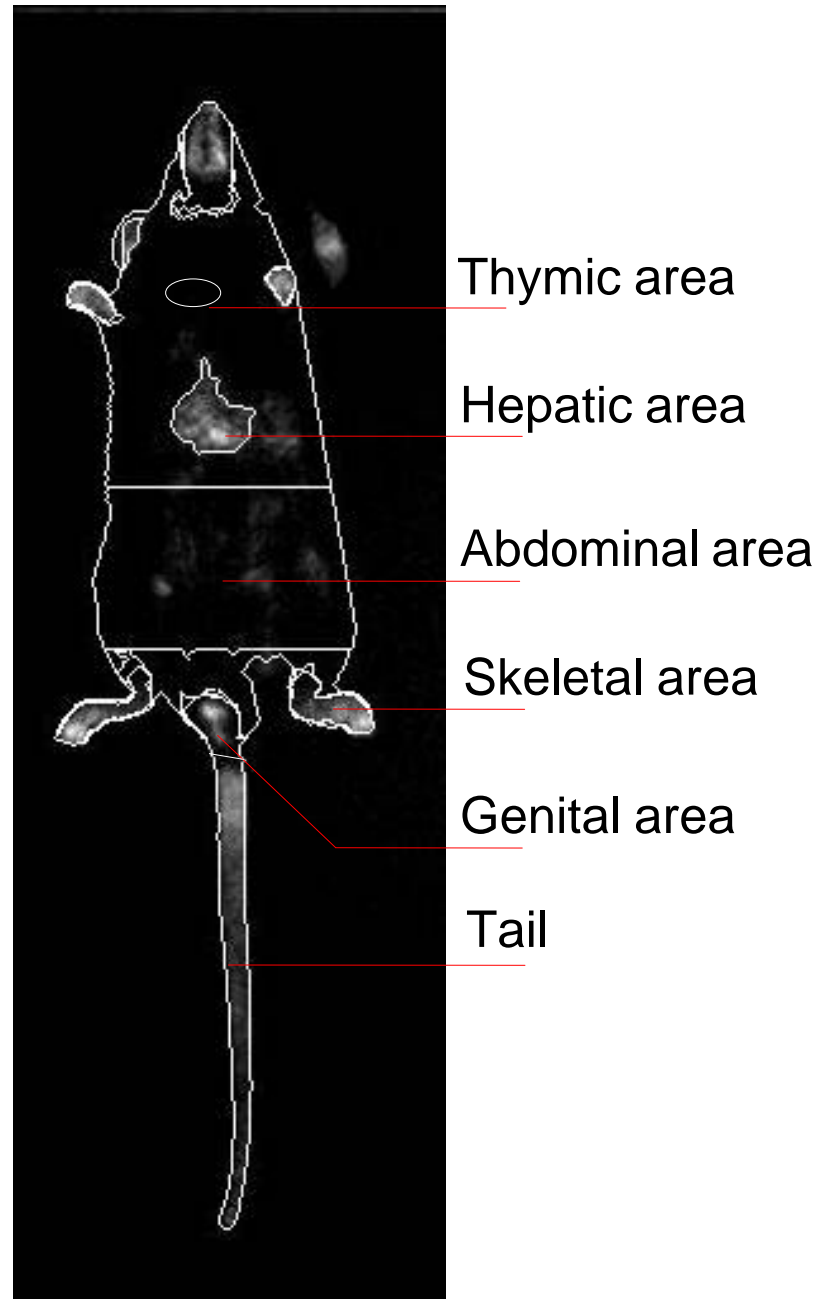

Rando – Fig.S2

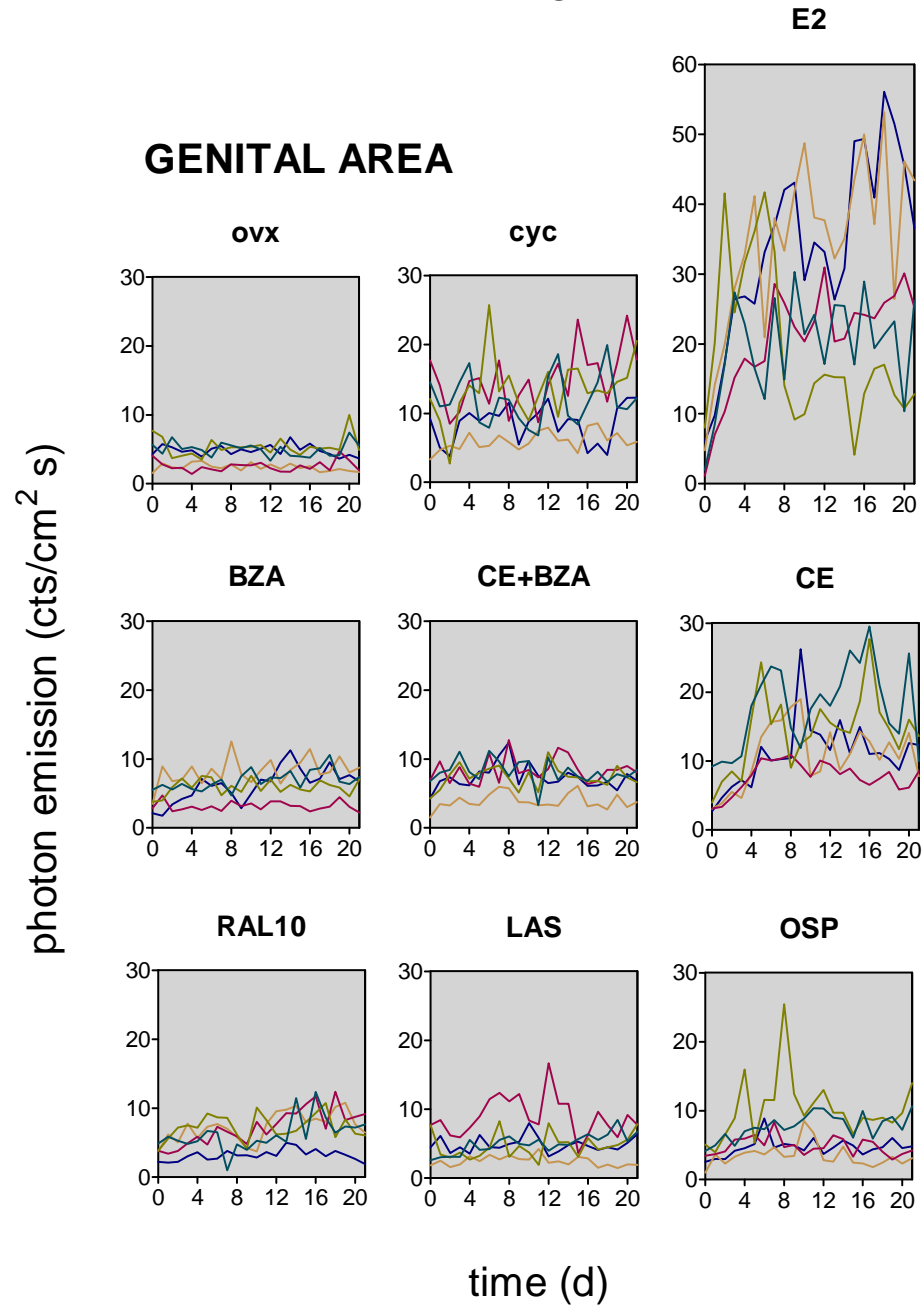

Rando – Fig.S3

### SKELETAL AREA

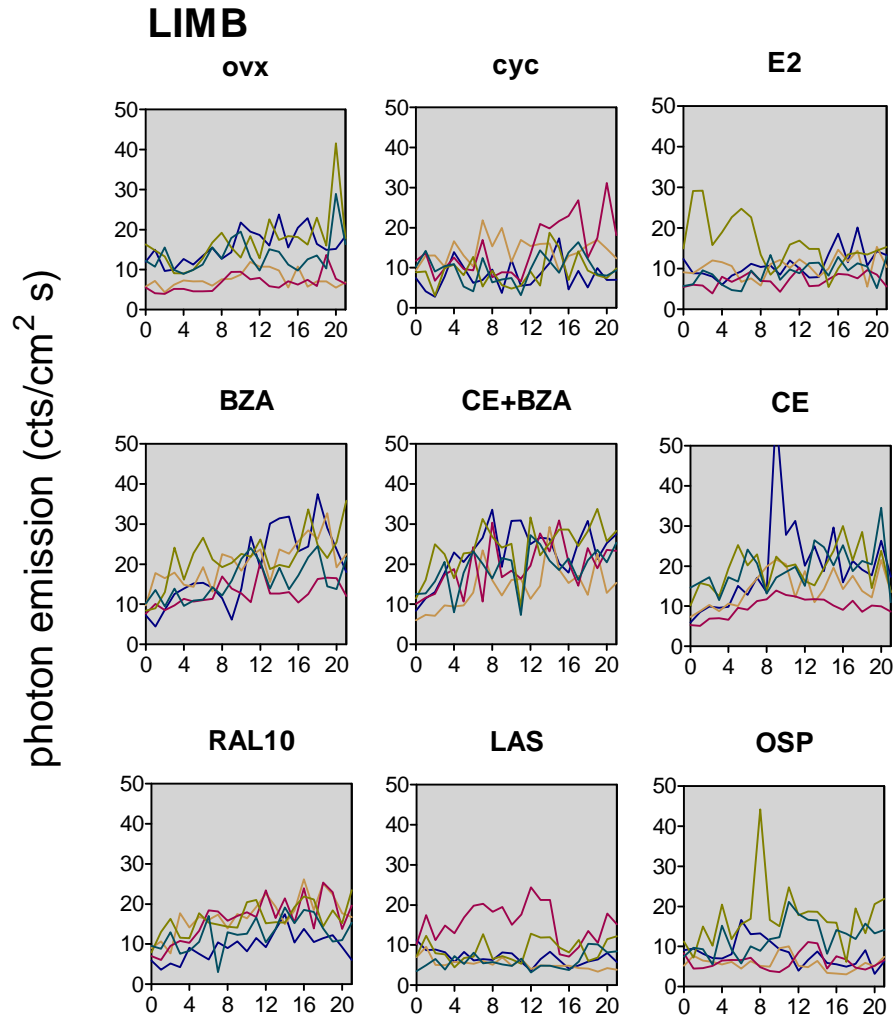

### TAIL

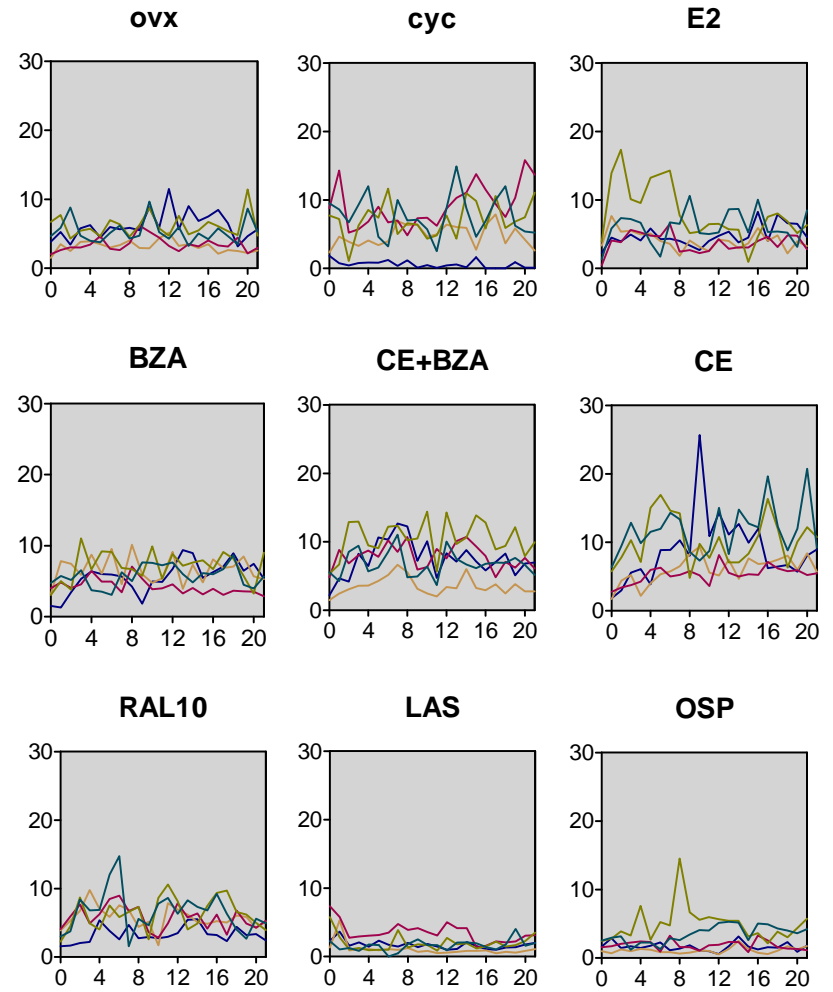

Rando – Fig.S4

HEPATIC AREA

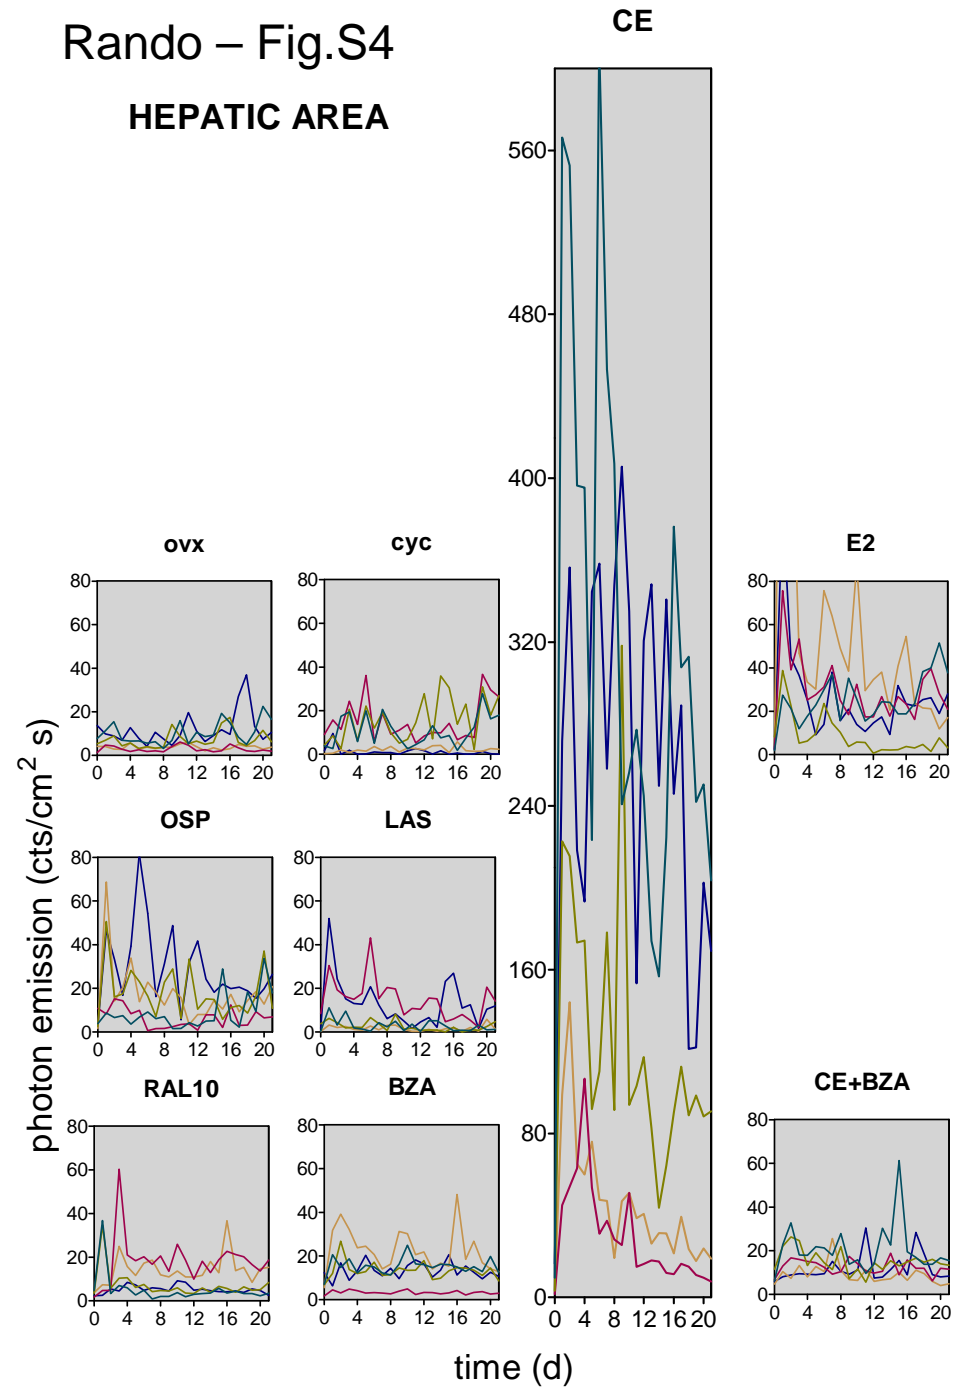

Rando – Fig.S5

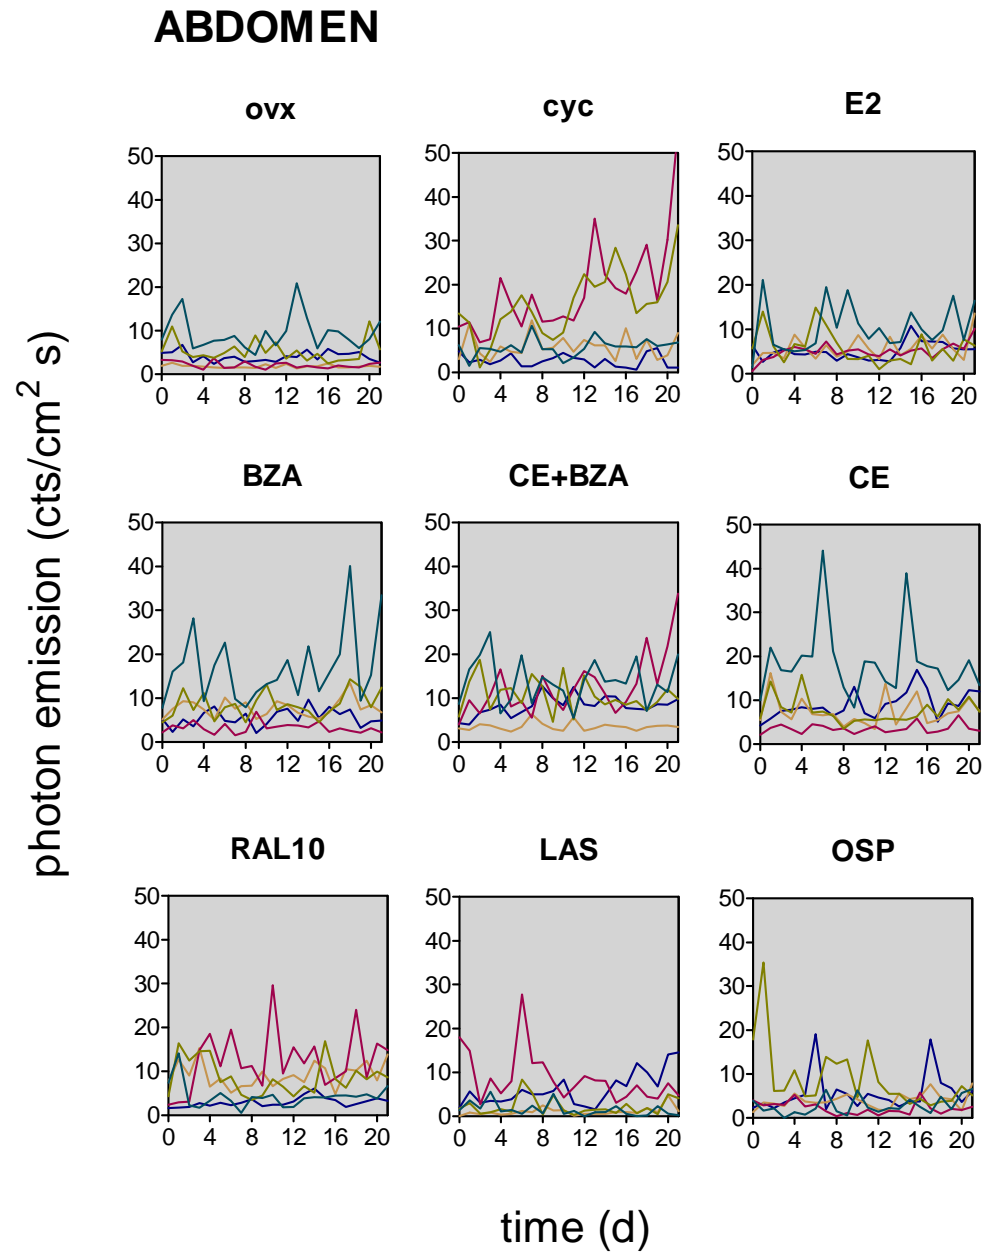

# Rando – Fig.S6

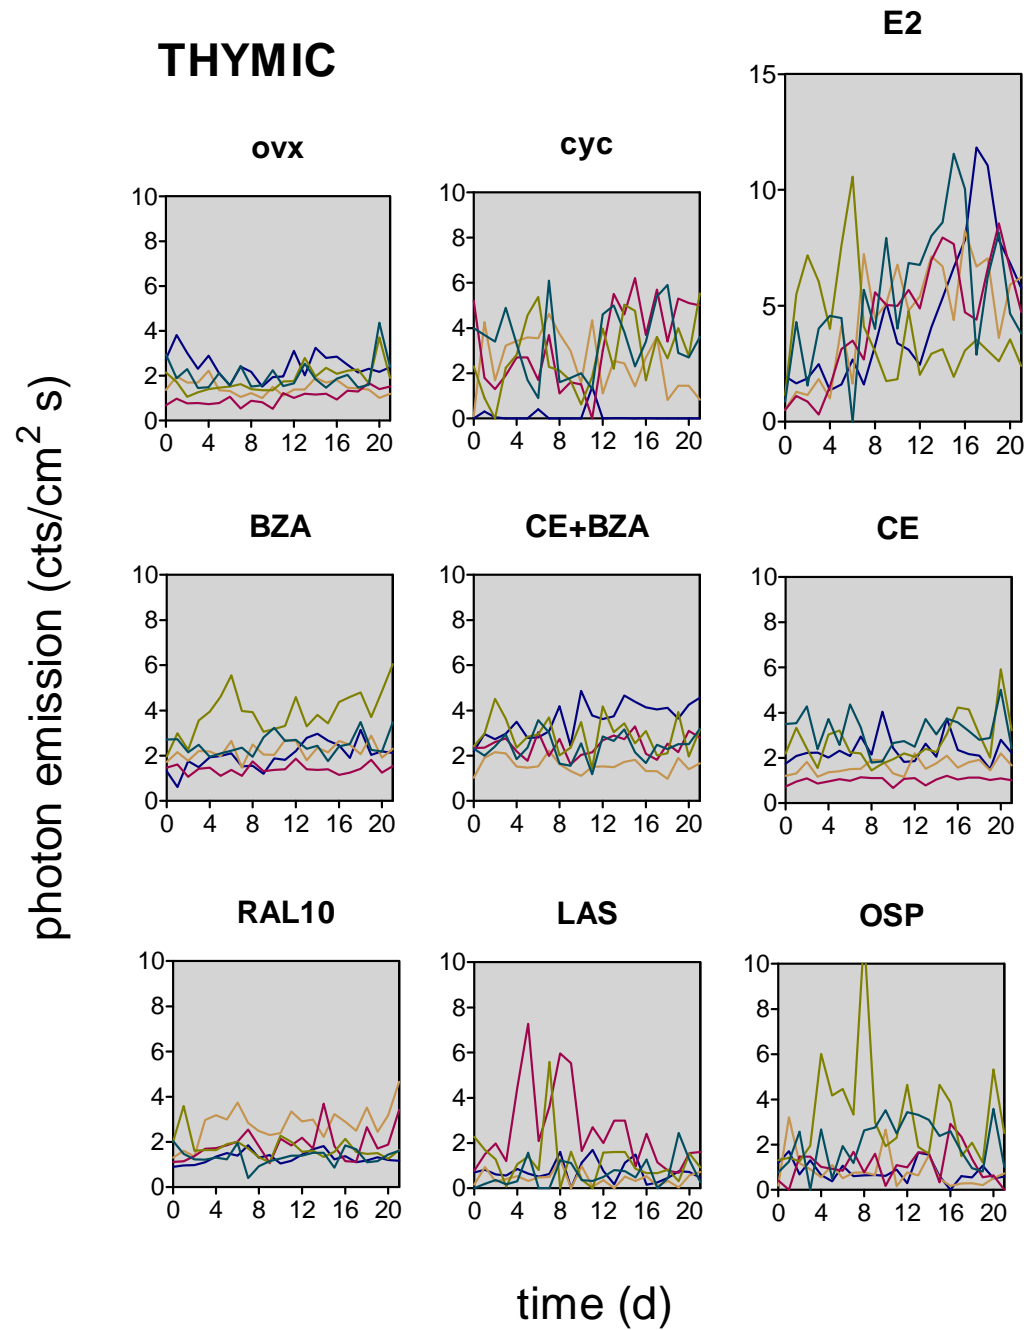

Supplement: me.2009-0514_1.pdf [file me.2009-0514_1.pdf]
